# Supplementary material for: The national trauma triage protocol: how EMS perspective can inform the guideline revision
Source: HighWire-hosted journal article supplement (doi:10.1136/tsaco-2021-000879), 2022-01-01
Supplement: tsaco-2021-000879supp002_data_supplement.pdf [file tsaco-2021-000879supp002_data_supplement.pdf]

## Appendix B:

Organizations that were requested to send the end-user feedback tool to their membership.

**Organizations**

|                                                                          |
|--------------------------------------------------------------------------|
| American Academy of Orthopedic Surgeons (AAOS)                           |
| American Academy of Pediatrics (AAP)                                     |
| American Ambulance Association (AAA)                                     |
| American Association for the Surgery of Trauma (AAST)                    |
| American Association for the Surgery of Trauma (AAST)                    |
| American College of Emergency Physicians (ACEP)                          |
| American Trauma Society (ATS)                                            |
| Association of Air Medical Services (AAMS)                               |
| Commission on Accreditation for Prehospital Continuing Education (CAPCE) |
| Commission on Accreditation of Medical Transport Systems (CAMTS)         |
| Committee on Accreditation of EMS Programs (CoAEMSP)                     |
| Eastern Association for the Surgery of Trauma (EAST)                     |
| Emergency Medical Services for Children (EMSC)                           |
| Emergency Nurses Association (ENA)                                       |
| International Association of Fire Chiefs (IAFC)                          |
| International Association of Fire Fighters (IAFF)                        |
| International Trauma Life Support (ITLS)                                 |
| National Association of Emergency Medical Technicians (NAEMT)            |
| National Association of EMS Educators (NAEMSE)                           |
| National Association of EMS Physicians (NAEMSP)                          |
| National Association of State 911 Administrators (NASNA)                 |
| National Association of State EMS Officials (NASEMSO)                    |
| National Registry of Emergency Medical Technicians (NREMT)               |
| National Volunteer Fire Council (NVFC)                                   |
| Orthopedic Trauma Association (OTA)                                      |
| Pediatric Trauma Society (PTS)                                           |
| Prehospital Trauma Life Support (PHTLS)                                  |
| Society of Trauma Nurses (STN)                                           |
| Western Trauma Association (WTA)                                         |
